# Supplementary material for: Targeted disruption of AdipoR1 and AdipoR2 causes abrogation of adiponectin binding and metabolic actions
Source: Springer Nature journal article supplement (doi:10.1038/nm1557), 2007-02-01
Supplement: 41591_2007_BFnm1557_MOESM52_ESM.pdf [file 41591_2007_BFnm1557_MOESM52_ESM.pdf]

## Supplementary Figure 1

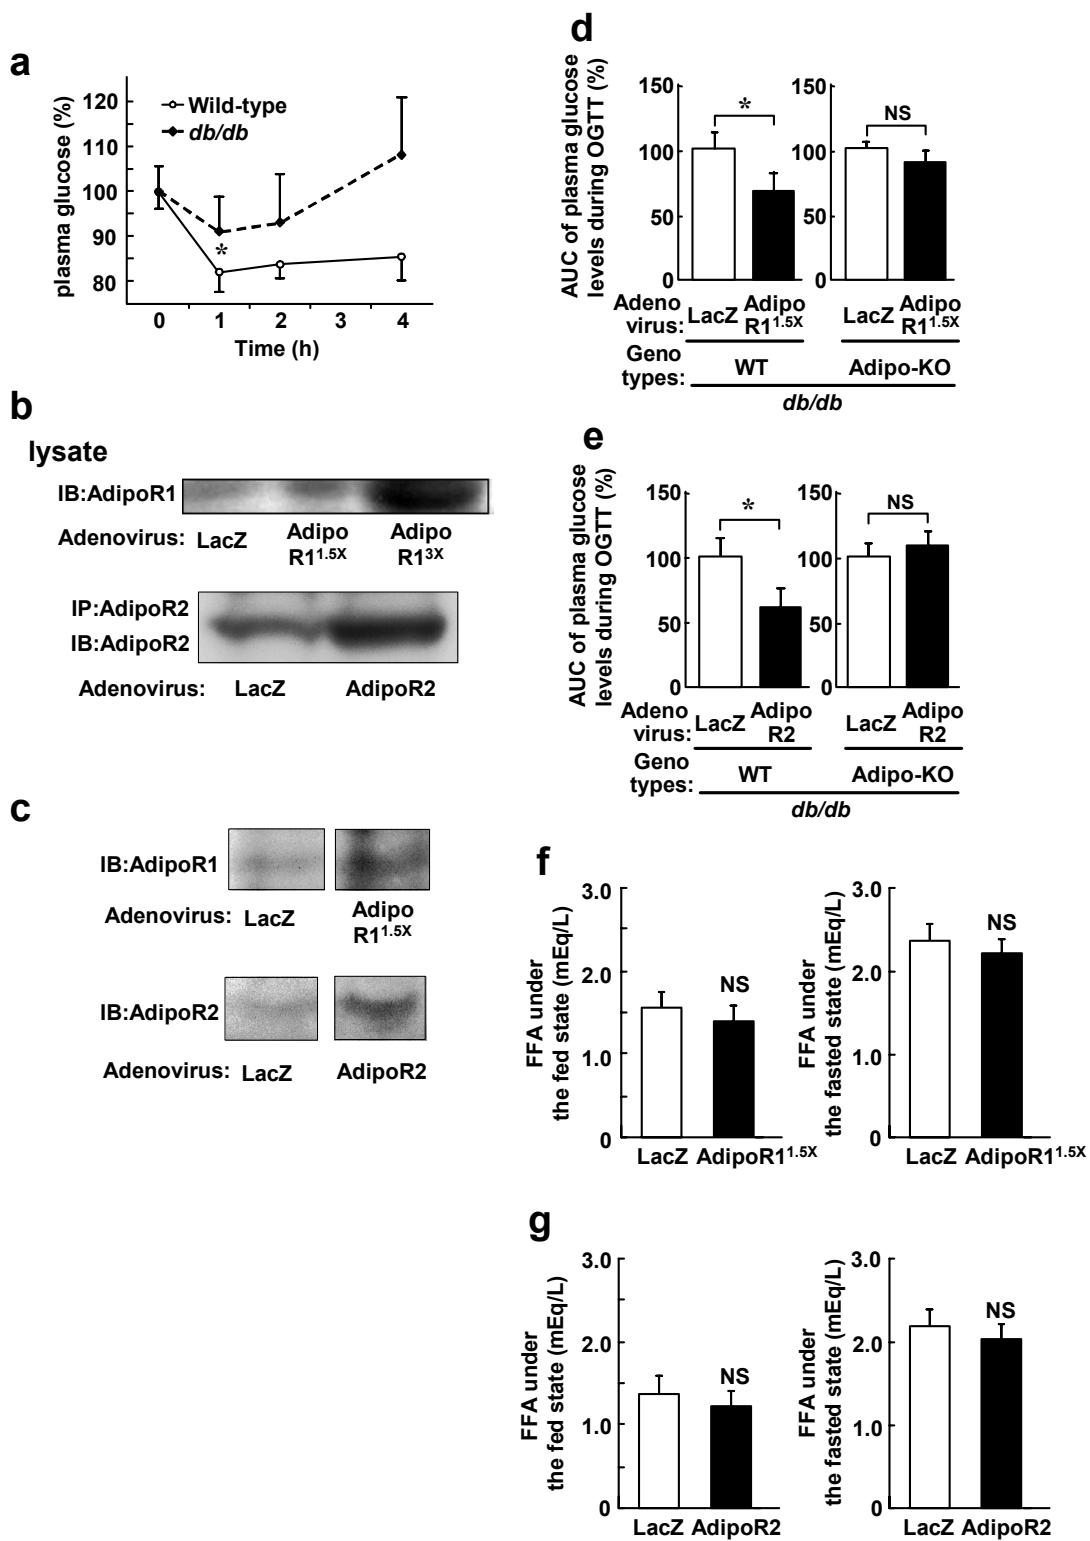

**Supplementary Figure 1 | Adenovirus-mediated expression of AdipoR1 or AdipoR2 in the liver of *db/db* mice.**

**a-g**, plasma glucose during adiponectin sensitivity test (30  $\mu$ g/10g body weight) (**a**), amounts of AdipoR1 (**b,c top**) or AdipoR2 (**b,c bottom**) protein in liver lysates (**b**) or liver membrane fractions (**c**), area under the glucose curves (AUC) during the oral glucose tolerance test (OGTT) (**d,e**), serum free fatty acid (FFA) levels (**f,g**) under the fed state (**f,g left**) or fasted state (**f,g right**), from wild-type (WT) (**a-g**) or adiponectin knockout (Adipo-KO) (**d,e**) wild-type (**a**) or *db/db* mice (**b-g**) infected with an adenovirus expressing LacZ or AdipoR1<sup>1.5X</sup> or AdipoR2 at a concentration of  $1 \times 10^8$  plaque-forming units (pfu) per gram of body weight. The results are expressed as the percent of the value of adenoviruses expressing LacZ-infected mice (**d,e**) or time 0 (**a**). Each bar represents the mean  $\pm$  s.e.m. ( $n = 4-10$  per condition). (\*,  $P < 0.05$ ; NS, there was no significant difference; between two groups, as indicated, or versus LacZ).
