# Supplementary material for: Targeted disruption of AdipoR1 and AdipoR2 causes abrogation of adiponectin binding and metabolic actions
Source: Springer Nature journal article supplement (doi:10.1038/nm1557), 2007-02-01
Supplement: 41591_2007_BFnm1557_MOESM53_ESM.pdf [file 41591_2007_BFnm1557_MOESM53_ESM.pdf]

## Supplementary Figure 2

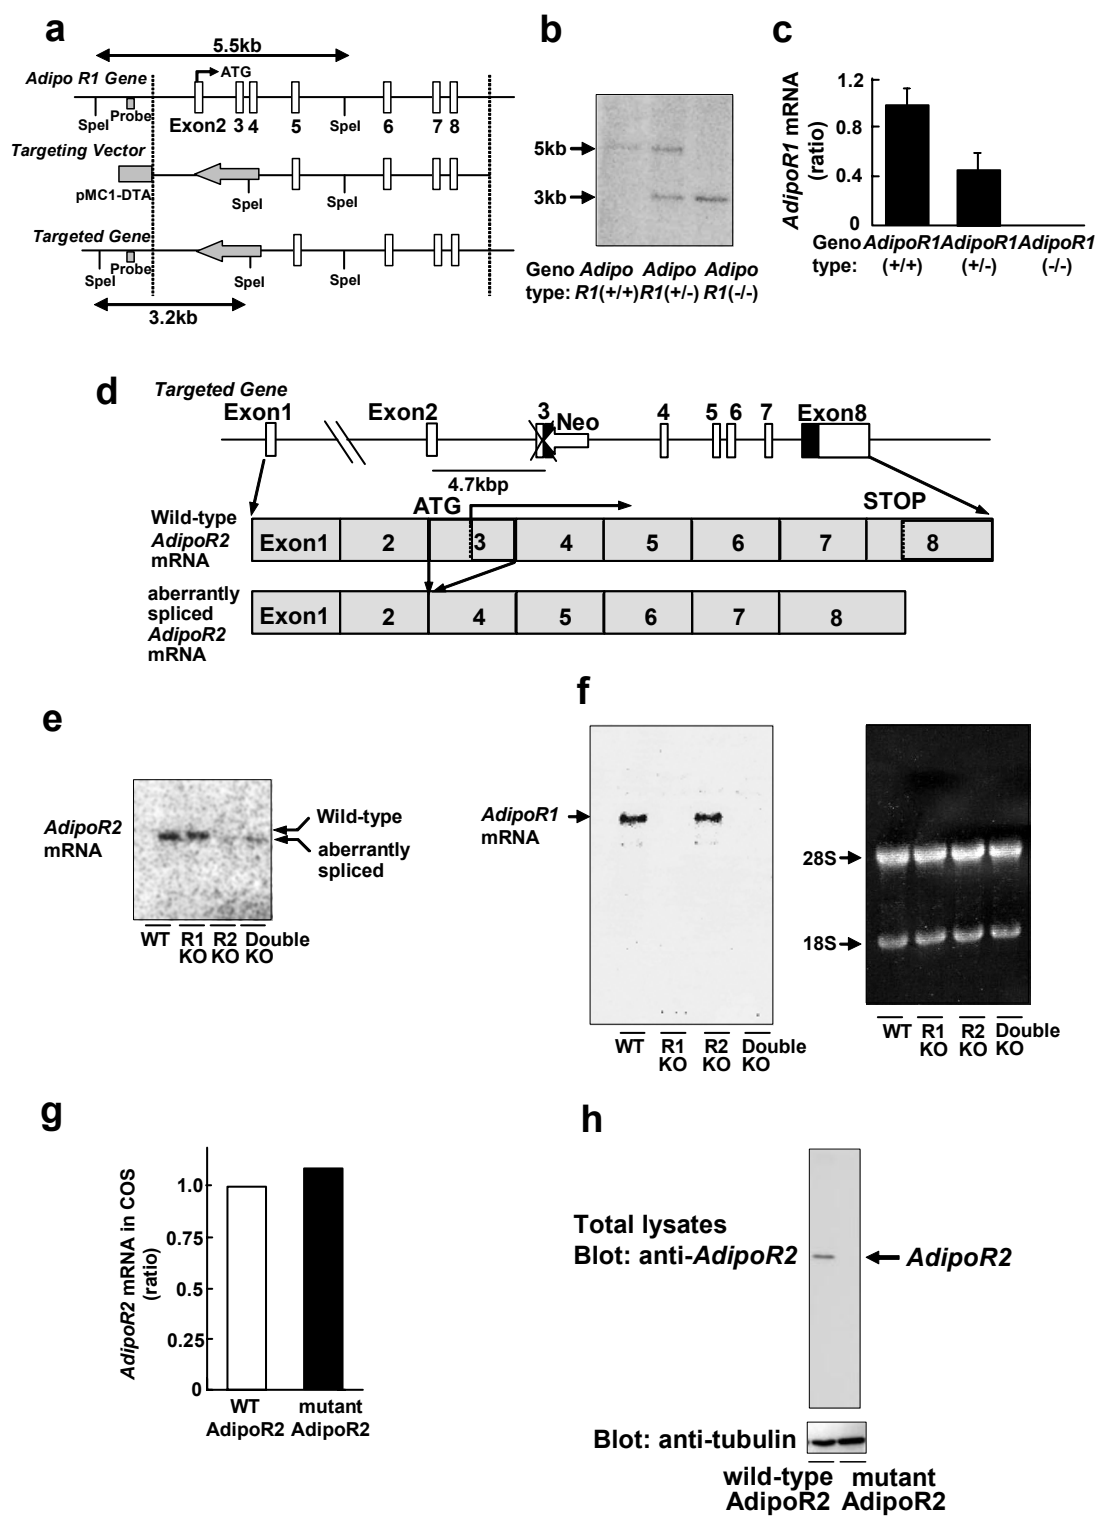

**Supplementary Figure 2 | Generation of *AdipoR1*<sup>-/-</sup>, *AdipoR2*<sup>-/-</sup> and *AdipoR1*<sup>-/-</sup> • *AdipoR2*<sup>-/-</sup> mice.**

**a**, schematic representation of the *AdipoR1* gene targeting strategy. Top, partial restriction map of the *AdipoR1* locus. Middle, *AdipoR1* gene targeting vector. Bottom, the expected mutant locus. The DNA fragment used as a probe for Southern blotting is also shown under the top diagram. **b**, *SpeI*-digested mice genomic DNA hybridized with the probe. **c**, Amounts of *AdipoR1* mRNA in the liver from *AdipoR1*<sup>+/+</sup> (+/+), *AdipoR1*<sup>+/-</sup> (-/-) and *AdipoR1*<sup>-/-</sup> (-/-). **d**, schematic representation of the *AdipoR2* gene targeting strategy. Top, the expected mutant locus. Middle, schematic representation of the Wild-type *AdipoR2* mRNA. Bottom, schematic representation of the aberrantly spliced *AdipoR2* mRNA. **e,f**, Northern blot analysis of the liver from Wild-type (WT), *AdipoR1*<sup>-/-</sup> (R1KO), *AdipoR2*<sup>-/-</sup> (R2KO) and *AdipoR1*<sup>-/-</sup> • *AdipoR2*<sup>-/-</sup> (Double KO) mice on C57Bl/6 and 129/sv background. **g,h**, amounts of *AdipoR2* mRNA (**g**) or protein (**h**) in COS cells transfected with vector expressing wild-type (WT) AdipoR2 derived from wild-type mice or mutant AdipoR2 derived from AdipoR2 knockout mice. The results are expressed as the ratio to the value of wild-type control (**c**). Each bar represents the mean ± s.e.m. (*n* = 4-6 per genotype) (**c**).
