# Supplementary material for: Targeted disruption of AdipoR1 and AdipoR2 causes abrogation of adiponectin binding and metabolic actions
Source: Springer Nature journal article supplement (doi:10.1038/nm1557), 2007-02-01
Supplement: 41591_2007_BFnm1557_MOESM54_ESM.pdf [file 41591_2007_BFnm1557_MOESM54_ESM.pdf]

## Supplementary Figure 3

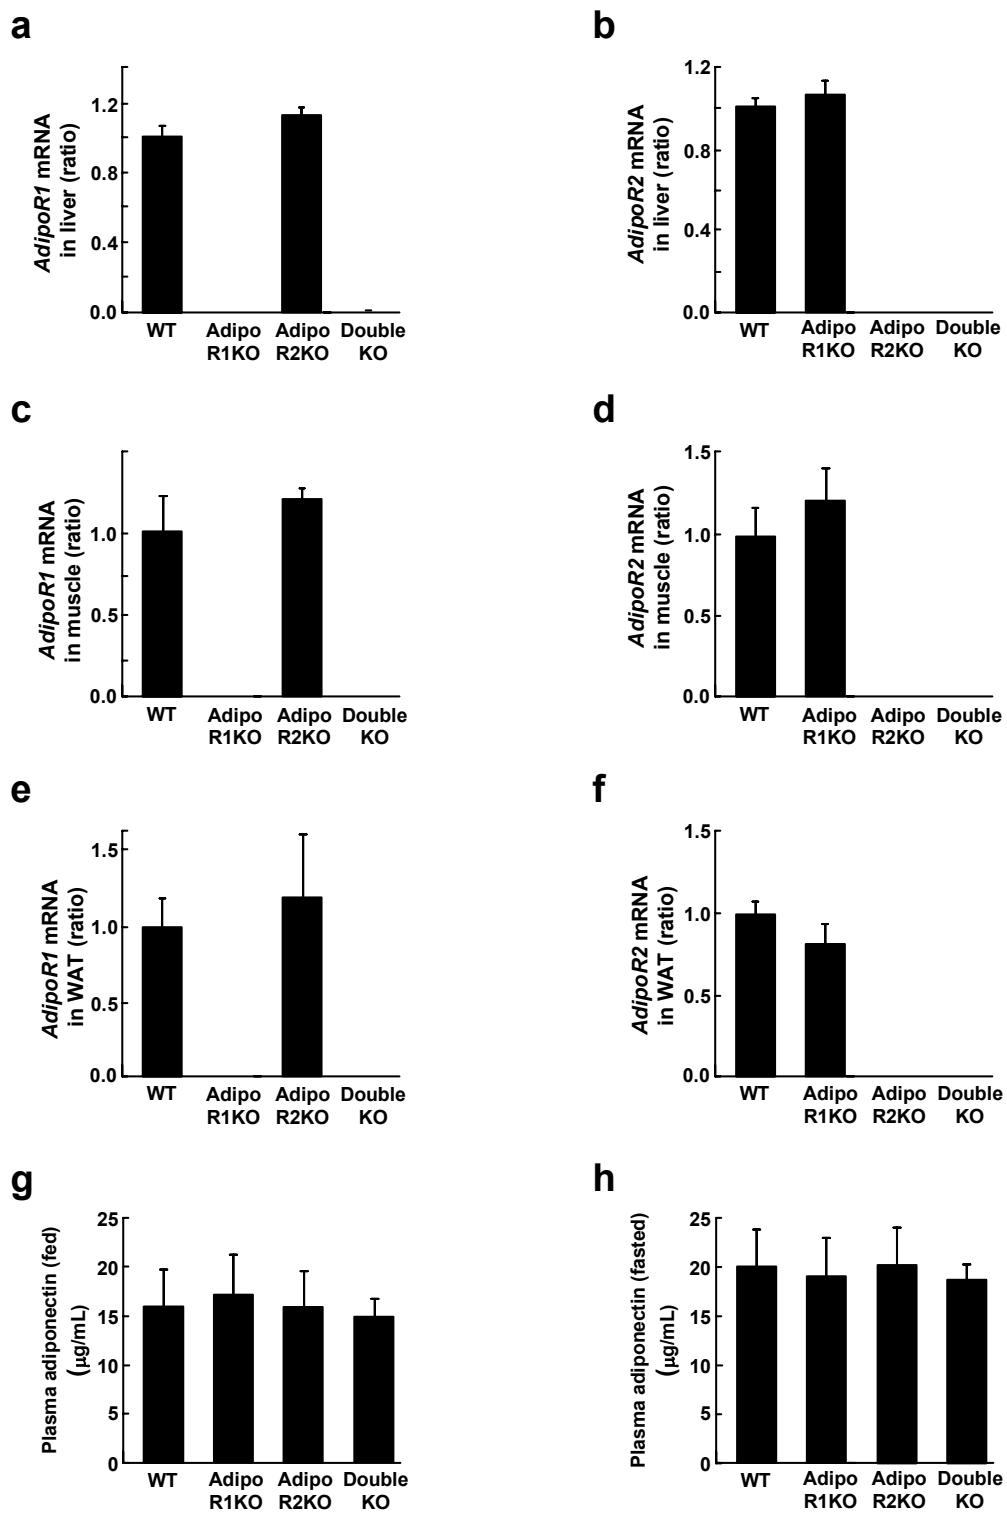

**Supplementary Figure 3 | Plasma adiponectin and expression levels of *AdipoR1* and *AdipoR2* in the liver, skeletal muscle, and white adipose tissue from *AdipoR1*<sup>-/-</sup>, *AdipoR2*<sup>-/-</sup>, and *AdipoR1*<sup>-/-</sup> · *AdipoR2*<sup>-/-</sup> mice.**

**a-h**, The amounts of *AdipoR1* (**a,c,e**) and *AdipoR2* mRNA (**b,d,f**) in the liver (**a,b**), skeletal muscle (**c,d**), and white adipose tissue (**e,f**) and plasma adiponectin levels on fed state (**g**) and on fasted state (**h**) from Wild-type (WT), *AdipoR1*<sup>-/-</sup> (AdipoR1KO), *AdipoR2*<sup>-/-</sup> (AdipoR2KO) and *AdipoR1*<sup>-/-</sup> · *AdipoR2*<sup>-/-</sup> (Double KO) mice on C57Bl/6 and 129/sv background. The results are expressed as the ratio to the value of wild-type control (**a-f**). Each bar represents the mean ± s.e.m. (*n* = 5-8 per genotype).
