# Supplementary material for: Targeted disruption of AdipoR1 and AdipoR2 causes abrogation of adiponectin binding and metabolic actions
Source: Springer Nature journal article supplement (doi:10.1038/nm1557), 2007-02-01
Supplement: 41591_2007_BFnm1557_MOESM56_ESM.pdf [file 41591_2007_BFnm1557_MOESM56_ESM.pdf]

## Supplementary Figure 5

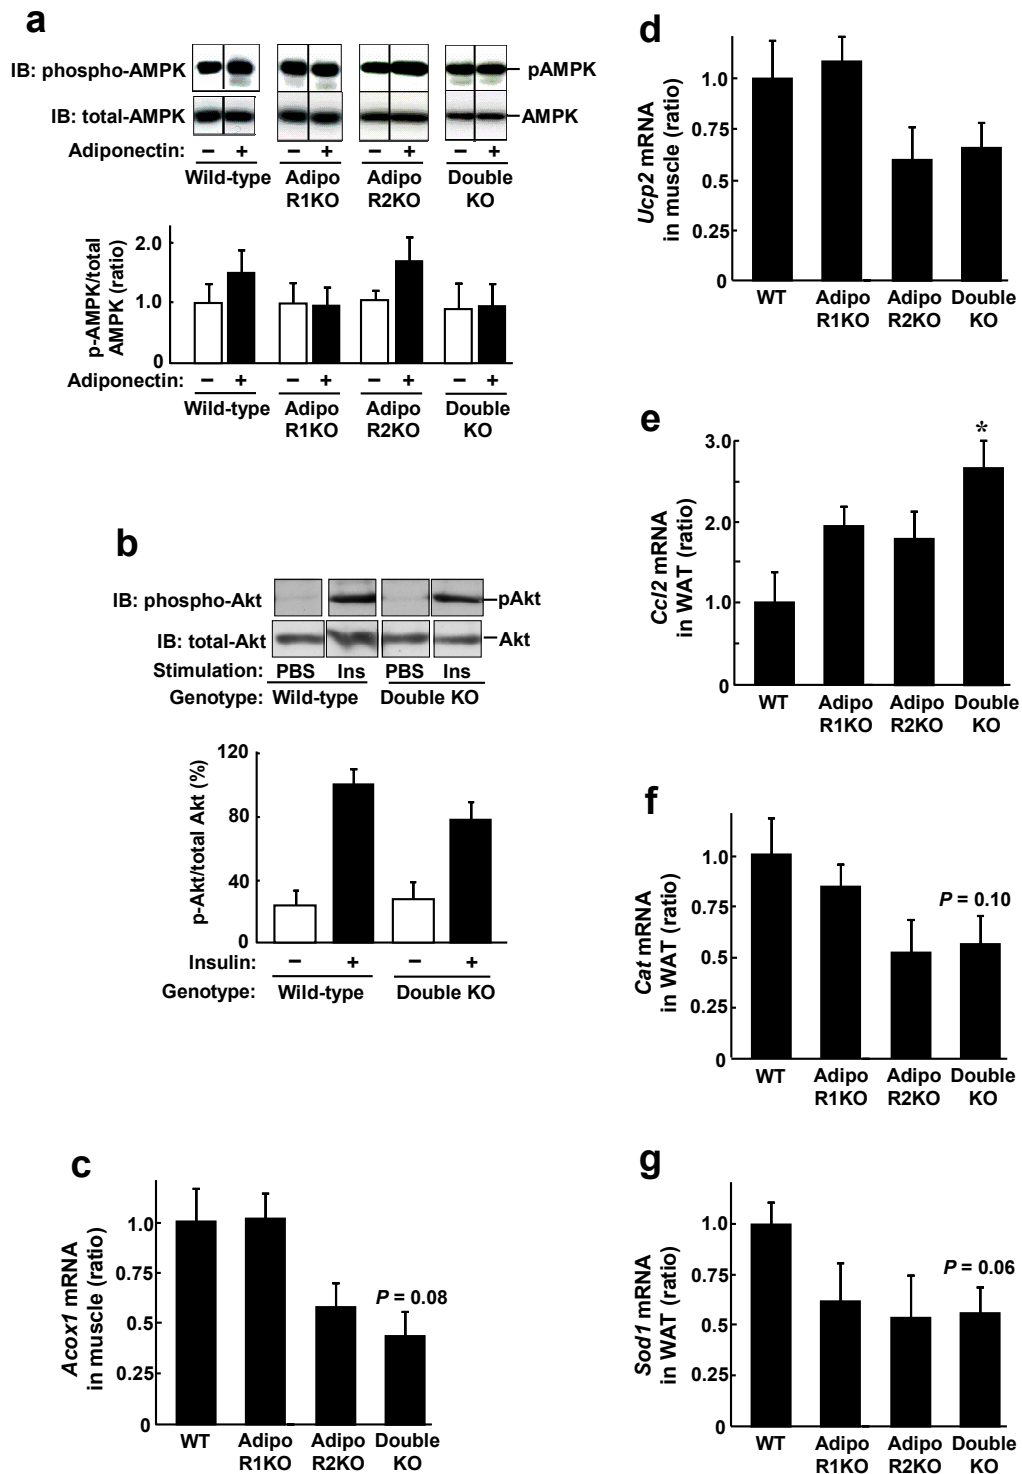

**Supplementary Figure 5 | Phosphorylation of AMPK stimulated with adiponectin and Akt stimulated with insulin and expression levels of molecules involved in lipid metabolism, inflammation and oxidative stress in skeletal muscle and white adipose tissue of *AdipoR1*<sup>-/-</sup>, *AdipoR2*<sup>-/-</sup>, and *AdipoR1*<sup>-/-</sup> · *AdipoR2*<sup>-/-</sup> mice.**

**a-g**, Phosphorylation and amount of AMPK (**a**) or Akt (**b**), amounts of *Acox1* (**c**), *Ucp2* (**d**), *Ccl2* (**e**), *Cat* (**f**) and *Sod1* (**g**) mRNA in skeletal muscle (**a-d**) or white adipose tissue (WAT) (**e-g**) treated with or without full-length adiponectin (10 µg/mL) for 10 min (**a**) or treated with or without insulin (0.01U/) for 10 min (**b**) of Wild-type, *AdipoR1*<sup>-/-</sup> (AdipoR1KO), *AdipoR2*<sup>-/-</sup> (AdipoR2KO) and *AdipoR1*<sup>-/-</sup> · *AdipoR2*<sup>-/-</sup> (Double KO) mice. Graph (**a,b** bottom) shows densitometric quantification of bands, and data were corrected for the total amount of AMPK (**a**) or Akt (**b**) protein in each sample and are expressed as the ratio to the value of vehicle-injected wild-type mice (**a**) or percent of the value of WT treated with insulin (**b**). The results are expressed as the ratio to the value of WT (**c-g**). Each bar represents the mean ± s.e.m ( $n = 4-7$  (**a-g**) per genotype or condition). (\*,  $P < 0.05$ ; versus wild-type).
